# Supplementary material for: Integrated copper–nickel oxide mesoporous nanowire arrays for high energy density aqueous asymmetric supercapacitors
Source: Royal Society of Chemistry journal article supplement (doi:10.1039/c5nh00100e), 2015-12-09
Supplement: c5nh00100e1.pdf [file c5nh00100e1.pdf]

Electronic Supplementary Material (ESI) for Nanoscale Horizons.  
This journal is © The Royal Society of Chemistry 2015

## Supporting Information

### Integrated copper-nickel oxide mesoporous nanowire arrays for high energy density aqueous asymmetric supercapacitors

Ruizhi Li, Zhijun Lin, Xin Ba, Yuanyuan Li,<sup>\*</sup> Ruimin Ding, Jinping Liu<sup>\*</sup>

#### I. Experimental Section

##### 1. Material Synthesis

**Synthesis of (Cu, Ni)O nanowire array electrode.** The precursor (Ni, Cu)<sub>2</sub>(OH)<sub>2</sub>CO<sub>3</sub> nanowire array was fabricated via a simple hydrothermal method, which was then transformed into (Cu, Ni)O via a post-annealing process. Typically, for molar ratio of Cu: Ni=1:1, 0.246 g CuCl<sub>2</sub> · 2H<sub>2</sub>O, 0.343 g NiCl<sub>2</sub> · 6H<sub>2</sub>O and 0.7 g urea were completely dissolved in 80 mL distilled water. And then, the resulting solution was transferred into a Teflon-lined stainless steel autoclave with a piece of carbon cloth and kept at 120 °C for 24 h. The carbon cloth covered with precursor nanowire array product was collected, dried, and further annealed at 350 °C for 2 h to obtain (Cu, Ni)O nanowire array. The molar ratio of Cu: Ni was controlled by changing the number of moles of the reactants of CuCl<sub>2</sub> · 2H<sub>2</sub>O and NiCl<sub>2</sub> · 6H<sub>2</sub>O. The total mole number of Cu+Ni was kept unchanged.

##### 2. Characterization

The electrode products were characterized by using SEM (JSM-6700F), TEM (JEM-2010FEF; 200 kV), XRD (Bruker D-8 Avance) and XPS (Thermo Electron, VG ESCALAB 250 spectrometer).

Pore size distribution was measured by BJH desorption method on a Micromeritics ASAP 2010 analyzer (accelerated surface area and porosimetry system). The mass of the active materials was measured on an AX/MX/UMX Balance (METTLER TOLEDO, Maximum = 5.1 g; d = 0.001 mg).

### 3. Electrode Preparation and Electrochemical Testing

All the electrochemical measurements were carried out using a CS310 electrochemical workstation. For individual working electrode samples, the performance was conducted in a three-electrode mode with a Pt foil as counter electrode and an Hg/HgO as reference electrode in 3 M NaOH. For device testing, a two electrode mode was used. To fabricate the asymmetric supercapacitor, an activated carbon electrode was firstly prepared by mixing 80 wt% activated carbon and 20 wt% PVA and casting the mixture onto a 1×2 cm<sup>2</sup> carbon cloth. This electrode (negative) was then pressed and paired with a (Cu, Ni)O nanowire electrode (positive) with 3 M NaOH as the electrolyte.

The specific capacitance, energy density and power density were calculated following the equations below:

$$C = I \Delta t / Vm$$

$$E = \frac{I \int V(t) dt}{m}$$

$$P = E / \Delta t$$

where  $I$  is the discharging current,  $\Delta t$  is the total discharging time,  $V$  is the voltage window excluding the  $IR$  drop,  $V(t)$  is discharging voltage at  $t$ ,  $dt$  is time differential, and  $m$  is the total mass of the active materials.

## II. Supplementary Results

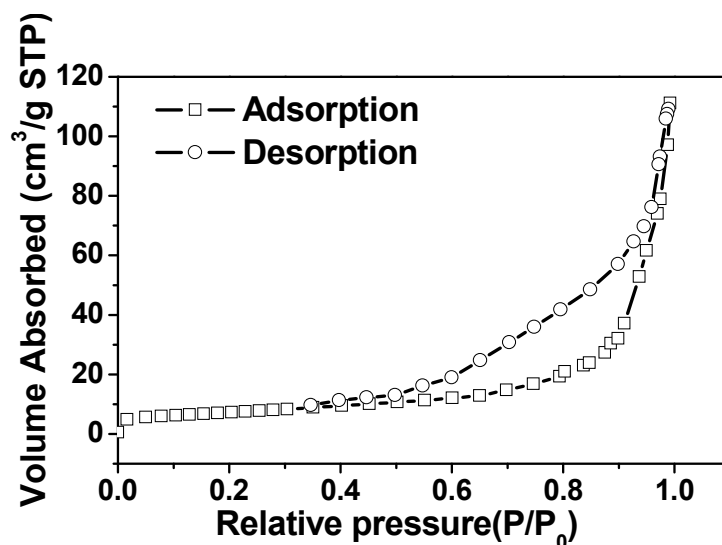

**Figure S1.** N<sub>2</sub> adsorption-desorption isotherm of the prepared (Cu, Ni)O nanowire array.

**Discussion:** This isotherm profile can be categorized as type IV with an obvious hysteresis loop observed at a relative pressure of 0.5-1.0, indicating the presence of a mesoporous structure. As a result, our (Cu, Ni)O nanowire array has a high specific surface area of 53 m<sup>2</sup> g<sup>-1</sup>, which is comparable to that of mesoporous NiO nanorings (55.4 m<sup>2</sup> g<sup>-1</sup>, 350 °C, Ref.1), and much superior to mesoporous CuO nanowires (13.05 m<sup>2</sup> g<sup>-1</sup>, 350 °C, Ref.2) and mesoporous Co<sub>3</sub>O<sub>4</sub> nanowire array (16.3 m<sup>2</sup> g<sup>-1</sup>, 400 °C, Ref.3).

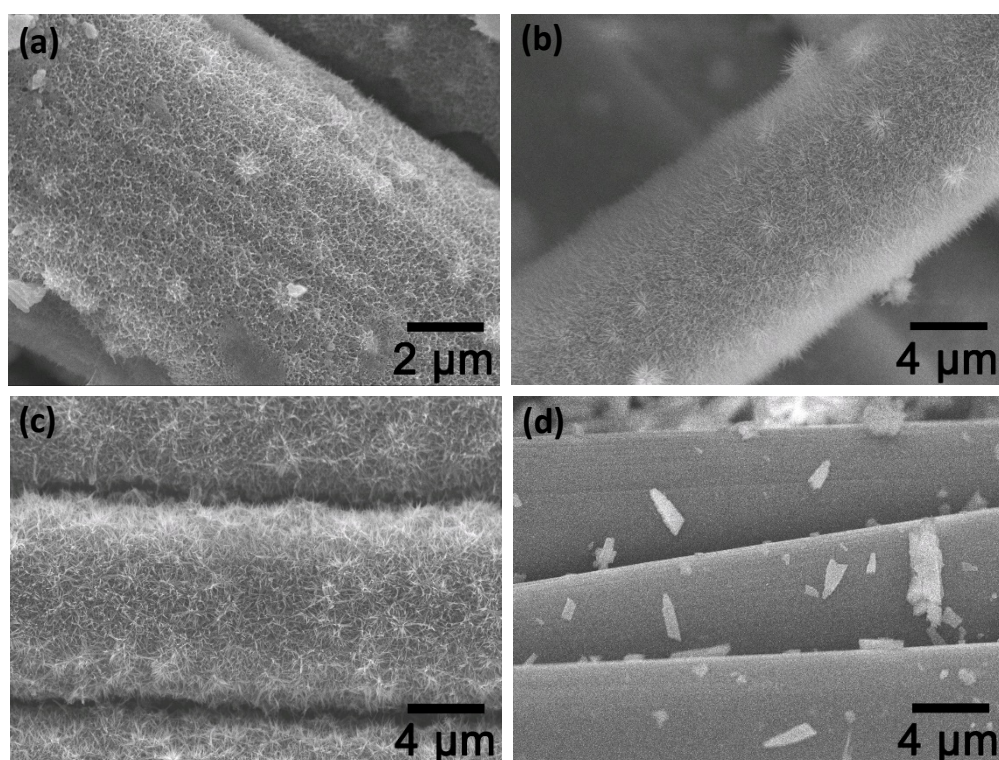

**Figure S2.** SEM images of (Cu, Ni)O electrodes with different Cu:Ni molar ratios: (a) 0:1, (b) 1:2, (c) 2:1 and (d) 1:0.

## References

- 1 D. S. Wang, R. Xu, X. Wang and Y. D. Li, *Nanotechnology*, 2006, **17**, 979.
- 2 L. J. Wang, K. Zhang, Z. Hu, W. C. Duan, F. Y. Cheng and J. Chen, *Nano Research*, 2014, **7**, 199.
- 3 Y. G. Li, B. Tan and Y. Y. Wu, *J. Am. Chem. Soc.*, 2006, **128**, 14258.
